# Supplementary material for: Carbon Microsphere From Postconsumer Soft Drink Bottles and Their Impact On Plant Growth Study of Cicer Arietinum
Source: Research Square preprint supplement (doi:10.21203/rs.3.rs-1016392/v1), 2021-10-29
Supplement: Supplementary file 1 [file 3132de6248f8a7cb2c448594.docx]

**Fig. S1.** Germination rate (%) with respect to time (h).

**
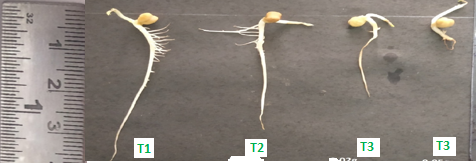
**

**Fig. S2.** Variation of root and shoot length after 10 days.

**
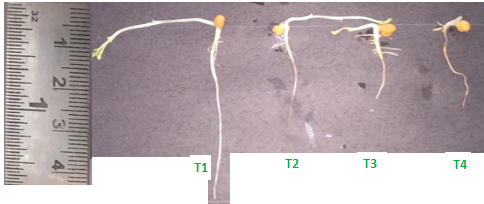
**

**Fig. S3.** Variation of root and shoot length after 15 days.

| 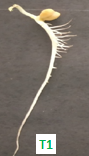 | 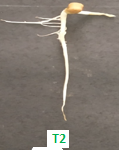 | 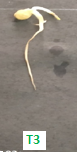 | 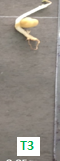 |
| --- | --- | --- | --- |

**Fig. S4.** Root morphology under different treatments.
